# Supplementary material for: Characteristics of and reasons for patients with chronic obstructive pulmonary disease to continue smoking, quit smoking, and switch to heated tobacco products
Source: PubMed Central journal article supplement (PMC8562318; doi:10.18332/tid/142848), 2021-11-01
Supplement: TID-19-85-s1.pdf [file TID-19-85-s1.pdf]

**Supplementary Table S1. Univariable and multivariable logistic regression analysis for factors of patients with COPD who are current smokers**

|                                     | Univariate analysis |           |                 | Multivariate analysis |           |                 |
|-------------------------------------|---------------------|-----------|-----------------|-----------------------|-----------|-----------------|
|                                     | Odds ratio          | 95% CI    | <i>p</i> -value | Odds ratio            | 95% CI    | <i>p</i> -value |
| Age                                 | 0.98                | 0.95–1.01 | 0.11            | 0.94                  | 0.91–0.98 | <0.01           |
| Sex (male)                          | 1.19                | 0.58–2.44 | 0.64            | 1.19                  | 0.53–2.66 | 0.68            |
| Duration of smoking                 | 1.06                | 1.04–1.09 | <0.01           | 1.07                  | 1.04–1.11 | <0.01           |
| Number of cigarettes smoked per day | 0.94                | 0.92–0.97 | <0.01           | 0.94                  | 0.91–0.97 | <0.01           |
| mMRC score                          | 0.77                | 0.60–0.98 | 0.03            | 0.68                  | 0.50–0.92 | 0.01            |
| SNAQ score                          | 0.82                | 0.71–0.94 | <0.01           | 0.83                  | 0.70–0.97 | 0.02            |
| Living alone                        | 2.03                | 1.20–3.44 | <0.01           | 1.71                  | 0.94–3.14 | 0.08            |

CI, confidence interval; mMRC, Modified Medical Research Council; SNAQ, Simplified Nutritional Appetite Questionnaire

**Supplementary Table S2. Survey for current smokers**

---

| <b>Did you change your smoking content?</b> |            |
|---------------------------------------------|------------|
| I reduced smoking                           | 61 (74.4%) |
| I switched to a light cigarette             | 40 (48.8%) |
| I switched to heated tobacco products       | 16 (19.5%) |

---

| <b>Reasons for not quitting smoking</b>                   |            |
|-----------------------------------------------------------|------------|
| I want to quit smoking but I have a desire to smoke       | 55 (67.1%) |
| I reduced smoking or switched to heated tobacco products  | 23 (28.0%) |
| I don't think smoking cessation will be effective anymore | 15 (18.3%) |
| I have family who smoke                                   | 7 (8.5%)   |
| I have a colleague who smokes                             | 5 (6.1%)   |

---

| <b>Guidance on smoking cessation</b>          |            |
|-----------------------------------------------|------------|
| Instructed to quit smoking every time         | 25 (30.5%) |
| Instructed to quit smoking occasionally       | 32 (39.0%) |
| Almost no smoking cessation guidance is given | 9 (11.0%)  |
| Smoking status is not confirmed               | 9 (11.0%)  |
| I tell my doctor that I am quitting smoking   | 7 (8.5%)   |

---

### Supplementary Table S3. Survey for past smokers

#### **The reasons for quitting smoking**

|                                                    |             |
|----------------------------------------------------|-------------|
| Because I was diagnosed with a respiratory disease | 122 (37.1%) |
| Because I had difficulty breathing                 | 79 (24.0%)  |
| Because I was instructed by a doctor               | 72 (21.9%)  |
| Because my family told me to quit                  | 50 (15.2%)  |
| Because the price of cigarettes went up            | 6 (1.8%)    |

#### **What would you like to do if you knew you had a lung disease and could go back to the past before you started smoking?**

|                                                                       |             |
|-----------------------------------------------------------------------|-------------|
| If I could go back in time, I wouldn't have smoked a single cigarette | 117 (35.5%) |
| If I could go back in time, I would have stopped when I was young     | 145 (44.1%) |
| If I could go back in time, I think I would have continued to smoke   | 67 (20.4%)  |
